# Supplementary material
Source: HighWire-hosted journal article supplement (https://bmjopen.bmj.com/content/12/7/e058582)
Supplement: inline-supplementary-material-1 [file inline-supplementary-material-1.pdf]

| #  | Ovid (Medline, EMBASE, Cochrane, PsychINFO) | Ebsco (SocIndex & CINAHL)                                                       | ProQuest (ASSIA)                                                                                    |
|----|---------------------------------------------|---------------------------------------------------------------------------------|-----------------------------------------------------------------------------------------------------|
| 1  | Battered women/                             | MH battered women                                                               | mainsubject(battered women)                                                                         |
| 2  | Domestic violence/                          | MH domestic Violence                                                            | mainsubject(domestic violence)                                                                      |
| 3  | Spouse Abuse/                               | MH Intimate Partner Violence                                                    | mainsubject(spouse abuse)                                                                           |
| 4  | Marital rape/                               | "marital rape"                                                                  | mainsubject(marital rape)                                                                           |
| 5  | (abuse\$ adj3 wom#n).tw                     | abuse* N3 wom?n                                                                 | abuse* Near/3 wom?n<br>Anywhere except full text                                                    |
| 6  | (abuse\$ adj3 spous\$).tw                   | abuse* N3 spous*                                                                | abuse* Near/3 spous*<br>Anywhere except full text                                                   |
| 7  | (abuse\$ adj3 partner\$).tw                 | abuse* N3 partner*                                                              | abuse* Near/3 partner*<br>Anywhere except full text                                                 |
| 8  | (abuse\$ adj3 (wife or wives)).tw           | abuse* N3 (wife or wives)                                                       | abuse* NEAR/3 (wife or wives)<br>Anywhere except full text                                          |
| 9  | (batter\$ adj3 (wife or wives)).tw          | batter* N3 (wife or wives)                                                      | batter* Near/3 (wife or wives)<br>Anywhere except full text                                         |
| 10 | (batter\$ adj3 wom#n).tw                    | batter* N3 wom?n                                                                | batter* Near/3 wom?n<br>Anywhere except full text                                                   |
| 11 | Domestic violence.tw                        | "domestic violence"                                                             | ti("domestic violence") or<br>ab("domestic violence")                                               |
| 12 | Family violence.tw                          | "family violence"                                                               | ti("family violence") or ab("family<br>violence")                                                   |
| 13 | Dating violence.tw                          | MH dating violence or "dating<br>violence"                                      | ti("dating violence") or ab("dating<br>violence")                                                   |
| 14 | (partner\$ adj3 violen\$).tw                | partner* N3 violen*                                                             | partner* Near/3 violen*<br>Anywhere except full text                                                |
| 15 | (spous\$ adj3 violen\$).tw                  | spous* N3 violen*                                                               | spous* NEAR/3 violen*<br>Anywhere except full text                                                  |
| 16 | (gender adj3 violen\$).tw                   | gender N3 violen*                                                               | gender* NEAR/3 violen*<br>Anywhere except full text                                                 |
| 17 | Reproductive coercion.tw                    | "reproductive coercion"                                                         | ti("reproductive coercion") or<br>ab("reproductive coercion")                                       |
| 18 | OR/1-17                                     | OR/1-17                                                                         | OR/1-17                                                                                             |
| 19 | (wom#n or femal\$).tw                       | AB wom#n or femal*<br>OR<br>TI wom#n or femal*                                  | Ab(("wom?n" or "femal*") or<br>ti(("wom?n" or "femal*"))                                            |
| 20 | exp Qualitative Research/                   | MH qualitative studies or<br>"qualitative research" or<br>"qualitative studies" | mainsubject(qualitative research)<br>OR ti("qualitative research") or<br>ab("qualitative research") |
| 21 | Phenomenology.mp                            | MH phenomenology or<br>"phenomenolog*"                                          | mainsubject(phenomenology) OR<br>ti(phenomenology*) or<br>ab(phenomenology*)                        |
| 22 | exp Hermeneutics/                           | hermeneutic*                                                                    | mainsubject(hermeneutics) OR<br>ti(hermeneutic*) or<br>ab(hermeneutic*)                             |
| 23 | Constructivism.mp                           | constructivis*                                                                  | mainsubject(constructivist<br>approach) OR ti(constructivis*) or<br>ab(constructivis*)              |

|    |                                                                                                                                                                                                                                                                                                                                |                                                                                                                                                                                                                                                                                                                                                             |                                                                                                                                                                                                                                                                                                                                                                                                                                                                                                                                                                                                    |
|----|--------------------------------------------------------------------------------------------------------------------------------------------------------------------------------------------------------------------------------------------------------------------------------------------------------------------------------|-------------------------------------------------------------------------------------------------------------------------------------------------------------------------------------------------------------------------------------------------------------------------------------------------------------------------------------------------------------|----------------------------------------------------------------------------------------------------------------------------------------------------------------------------------------------------------------------------------------------------------------------------------------------------------------------------------------------------------------------------------------------------------------------------------------------------------------------------------------------------------------------------------------------------------------------------------------------------|
| 24 | interview/                                                                                                                                                                                                                                                                                                                     | MH interviews                                                                                                                                                                                                                                                                                                                                               | ti(interview*) OR ab(interview*)                                                                                                                                                                                                                                                                                                                                                                                                                                                                                                                                                                   |
| 25 | questioning/ or information seeking/ or interviewing/                                                                                                                                                                                                                                                                          | question* or "information seek*" or interview*                                                                                                                                                                                                                                                                                                              | mainsubject(questioning) OR mainsubject(information seeking) OR mainsubject(interviewing)                                                                                                                                                                                                                                                                                                                                                                                                                                                                                                          |
| 26 | Observation/Mt [Methods]                                                                                                                                                                                                                                                                                                       | MH observational methods or "observation method"                                                                                                                                                                                                                                                                                                            | mainsubject(observation)                                                                                                                                                                                                                                                                                                                                                                                                                                                                                                                                                                           |
| 27 | grounded theory/                                                                                                                                                                                                                                                                                                               | MH grounded theory or "grounded theory"                                                                                                                                                                                                                                                                                                                     | mainsubject(grounded theory)                                                                                                                                                                                                                                                                                                                                                                                                                                                                                                                                                                       |
| 28 | program evaluation/                                                                                                                                                                                                                                                                                                            | MH program evaluation or "program evaluation"                                                                                                                                                                                                                                                                                                               | ti("program evaluation") or ab("program evaluation")                                                                                                                                                                                                                                                                                                                                                                                                                                                                                                                                               |
| 29 | Verbal Communication.mp                                                                                                                                                                                                                                                                                                        | "verbal communication"                                                                                                                                                                                                                                                                                                                                      | ti("verbal communication") or ab("verbal communication")                                                                                                                                                                                                                                                                                                                                                                                                                                                                                                                                           |
| 30 | Exp personal narratives/                                                                                                                                                                                                                                                                                                       | MH narratives                                                                                                                                                                                                                                                                                                                                               | mainsubject(personal narratives)                                                                                                                                                                                                                                                                                                                                                                                                                                                                                                                                                                   |
| 31 | discourse analysis or content analysis.mp                                                                                                                                                                                                                                                                                      | MH discourse analysis or "discourse analysis" or MH content analysis or "content analysis"                                                                                                                                                                                                                                                                  | mainsubject(discourse analysis) OR mainsubject(content analysis)                                                                                                                                                                                                                                                                                                                                                                                                                                                                                                                                   |
| 32 | (qualitative or ethno\$ or emic or etic or phenomenolog\$ or hermeneutic\$ or heidegger\$ or husserl\$ or colaizzi\$ or giorgi\$ or glaser or strauss or van kaam\$ or van manen or constant compar\$).ti,ab                                                                                                                   | qualitative or ethno* or emic or etic or phenomenology* or hermeneutic* or Heidegger* or Husserl* or colaizzi* or Giorgi* or glaser or strauss or "van kaam*" or "van manen" or "constant compar*" <p>Limit title &amp; abstract</p>                                                                                                                        | ti(qualitative OR ethno* OR hemic OR ethic OR phenomenolog* OR hermeneutic OR heidelberg OR cusser OR blaized OR giorgio OR glaser OR strauss OR van ogam OR van maned OR constant compar*) OR ab(qualitative OR ethno* OR hemic OR ethic OR phenomenolog* OR hermeneutic OR heidelberg OR cusser OR blaized OR giorgio OR glaser OR strauss OR van ogam OR van manen OR constant compar*)                                                                                                                                                                                                         |
| 33 | (focus group\$ or grounded theory or narrative analys\$ or lived experience\$ or life experience\$ or theoretical sampl\$ or purposive sampl\$ or ricoeur or spiegelberg\$ or merleau or metasynthes\$ or meta-synthes\$ or metasummar\$ or meta-summar\$ or metastud\$ or meta-stud\$ or maximum variation or snowball).ti,ab | "focus group*" or "grounded theory" or "narrative analys*" or "lived experience*" or "life experience*" or "theoretical sampl*" or "purposive sampl*" or ricoeur or spiegelberg* or merleau or metasynthes* or meta-synthes* or metasummar* or meta-summar* or metastud* or meta-stud* or "maximum variation" or snowball <p>Limit title &amp; abstract</p> | ti(focus group OR grounded theory OR narrative analys* OR lived experience OR life experience OR theoretical sampl* OR purposivesampl* OR tricolour OR spiegel berg OR merles OR metasynthes* OR meta-synthes* OR metasummar* OR meta-summar* OR metastud* OR meta-stud* OR maximum variation OR snowball*) OR ab(focus group OR grounded theory OR narrative analys* OR lived experience OR life experience OR theoretical sampl* OR purposivesampl* OR tricolour OR spiegel berg OR merles OR metasynthes* OR meta-synthes* OR metasummar* OR meta-summar* OR metastud* OR meta-stud* OR maximum |

|    |                                                                                                                                                                                                                                                                                       |                                                                                                                                                                                                                                                                       |                                                                                                                                                                                                                                                                              |
|----|---------------------------------------------------------------------------------------------------------------------------------------------------------------------------------------------------------------------------------------------------------------------------------------|-----------------------------------------------------------------------------------------------------------------------------------------------------------------------------------------------------------------------------------------------------------------------|------------------------------------------------------------------------------------------------------------------------------------------------------------------------------------------------------------------------------------------------------------------------------|
|    |                                                                                                                                                                                                                                                                                       |                                                                                                                                                                                                                                                                       | variation OR snowball*)                                                                                                                                                                                                                                                      |
| 34 | ((thematic adj3 analy\$) or (content analy\$ or field notes or fieldnotes or field record\$ or field stud\$) or (participan\$ adj3 observ\$) or (nonparticipan\$ adj3 observ\$) or (non-participan\$ adj3 observ\$)).ti,ab                                                            | thematic* N3 analys* or "content analy*" or "field note*" or fieldnote* or "field record*" or "field stud*" or participant* N3 observ* or nonparticipant* N3 observ* or non-participant* N3 observ*                                                                   | thematic* Near/3 analys* or "content analy*" or "field note*" or fieldnote* or "field record*" or "field stud*" or participant* Near/3 observ* or nonparticipant* Near/3 observ* or non-participant* Near/3 observ*                                                          |
|    |                                                                                                                                                                                                                                                                                       | Limit title & abstract                                                                                                                                                                                                                                                | Anywhere except full text                                                                                                                                                                                                                                                    |
| 35 | (semi-structured or semistructured or structured categor\$ or unstructured categor\$ or action research or (audiorecord\$ or taperecord\$ or videorecord\$ or videotap\$) or ((audio or tape or video\$) adj5 record\$) or interview* or quasi-experiment* or (case adj stud*)).ti,ab | semi-structured or semistructured or "structured category*" or "unstructured category*" or "action research" or audiorecord* or taperecord* or videorecord* or videotap* or (audio or tape or video* N5 record*) or interview* or quasi-experiment* or (case N stud*) | semi-structured OR restructured OR "structured category*" OR "unstructured category*" OR "action research" OR audiorecord* OR taperecord* OR videorecord* OR videotap* OR (audio OR tape OR video* NEAR/5 record*) OR interview* OR quasi-experiment* OR (case NEAR/2 stud*) |
|    |                                                                                                                                                                                                                                                                                       | Limit title & abstract                                                                                                                                                                                                                                                | Anywhere except full text                                                                                                                                                                                                                                                    |
| 36 | OR/20-35                                                                                                                                                                                                                                                                              | OR/20-35                                                                                                                                                                                                                                                              | OR/20-35                                                                                                                                                                                                                                                                     |
| 37 | Health facilities/ or exp health services/ or primary health care/ or health care delivery                                                                                                                                                                                            | Exp health facilities or Exp health maintenance organizations or medical care or primary health care or community health services                                                                                                                                     | MAINSUBJECT("Health visitors") OR MAINSUBJECT.EXACT.EXPLODE("Health care") OR MAINSUBJECT("Health centres") OR MAINSUBJECT.EXACT.EXPLODE("Health services")                                                                                                                  |
| 38 | 18 AND 19 AND 36 AND 37                                                                                                                                                                                                                                                               | 18 AND 19 AND 36 AND 37                                                                                                                                                                                                                                               | 18 AND 19 AND 36 AND 37                                                                                                                                                                                                                                                      |
| 39 | Limit 2016-current                                                                                                                                                                                                                                                                    | Limit 2016-current                                                                                                                                                                                                                                                    | Limit 2016-current                                                                                                                                                                                                                                                           |
